# Supplementary material
Source: publisher figshare collection journal article supplement (https://gsapubs.figshare.com/ndownloader/files/22739498)
Supplement: Supplementary file 1 [file 22739498]

GSA Data Repository Item # 7507

Title of article Correlations between dikes of the Monument Swarm,  
central Oregon, and Picture Gorge basalt flows

Author(s) J. S. Fruchter and Baldwin

see GSA Bulletin v. 86, p. 514 - 516

Contents 5 pages

Sample Locations - Dikes of the Monument Swarm, Oregon

---

---

---

---

---

---

---

---

## Sample Locations - Dikes of the Monument Swarm, Oregon

| Sample # | County  | Quadrangle | Location                                                                          |
|----------|---------|------------|-----------------------------------------------------------------------------------|
| D-1      | Grant   | Monument   | SE $\frac{1}{4}$ , T9S, R28E, Sec. 29, SE corner, S. of highway.                  |
| D-2      | "       | "          | SW $\frac{1}{4}$ , T9S, R28E, Sec. 29, SE corner, just NW of MD-1.                |
| D-3      | "       | "          | SE $\frac{1}{4}$ , T9S, R28E, Sec. 29, NE corner, N. of highway.                  |
| D-4      | "       | "          | SW $\frac{1}{4}$ , T9S, R28E, Sec. 20, NW corner, N. of highway.                  |
| D-5      | "       | Kimberly   | SE $\frac{1}{4}$ , T9S, R26E, Sec. 16, W. side, N. of highway.                    |
| D-6      | "       | "          | SE $\frac{1}{4}$ , T9S, R26E, Sec. 15, NE corner, N. of highway.                  |
| D-7      | "       | Monument   | SW $\frac{1}{4}$ , T9S, R27E, Sec. 12, W. side, W. of highway.                    |
| D-8      | "       | "          | SW $\frac{1}{4}$ , T9S, R27E, Sec. 9, NE corner, dirt road, S. of John Day River. |
| D-9      | Grant   | "          | SW $\frac{1}{4}$ , T9S, R27E, Sec. 9, N. side 0.6 km W. of D-8.                   |
| D-10     | Wheeler | Kimberly   | SW $\frac{1}{4}$ , T9S, R25E, Sec. 23, NE corner, NE of highway.                  |
| D-12     | Grant   | "          | SE $\frac{1}{4}$ , T9S, R26E, Sec. 14, NW corner, N. of highway.                  |

-continued-

Cont'd.

| Sample # | County | Quadrangle | Location                                                                                                        |
|----------|--------|------------|-----------------------------------------------------------------------------------------------------------------|
| D-13     | Grant  | Kimberly   | SE $\frac{1}{4}$ , T9S, R26E, Sec. 14, NW corner<br>slightly W. of D-12.                                        |
| D-14     | "      | "          | SE $\frac{1}{4}$ , T9S, R27E, Sec. 7, N. side, N. of<br>highway.                                                |
| D-15     | "      | "          | SE $\frac{1}{4}$ , T9S, R26E, Sec. 26, E. side, N. of<br>Rudio Creek road.                                      |
| D-16     | "      | "          | SE $\frac{1}{4}$ , T9S, R26E, Sec. 11, SE corner,<br>roadcut, N. side of highway.                               |
| D-17     | "      | "          | SE $\frac{1}{4}$ , T9S, R26E, Sec. 11, just W. of<br>D-16.                                                      |
| D-18     | "      | "          | SE $\frac{1}{4}$ , T9S, R27E, Sec. 8, NW corner, NW<br>of Cupper Canyon road.                                   |
| D-19     | "      | Monument   | SW $\frac{1}{4}$ , T9S, R27E, Sec. 5, E. side, N. of<br>highway.                                                |
| D-20     | "      | "          | SW $\frac{1}{4}$ , T9S, R27E, Sec. 4, SW corner,<br>roadcut, N. side of highway.                                |
| D-21     | "      | "          | SW $\frac{1}{4}$ , T9S, R27E, Sec. 3, W. side, roadcut,<br>N. side of highway.                                  |
| D-23     | "      | "          | SW $\frac{1}{4}$ , T9S, R27E, Sec. 3, NE corner, N.<br>side of highway.                                         |
| D-24     | "      | "          | SW $\frac{1}{4}$ , T9S, R27E, Sec. 3, S. side, S. of<br>John Day River where dike cuts large<br>irregular sill. |

- continued -

Cont'd.

| Sample # | County  | Quadrangle   | Location                                                                                                                                 |
|----------|---------|--------------|------------------------------------------------------------------------------------------------------------------------------------------|
| D-25     | Gilliam | LeFevre      | NW $\frac{1}{4}$ , T6S, R24E, Sec. 4, NW corner, center<br>Prarie (7 $\frac{1}{2}$ ') top of hill, E. of road, 0.8 km SE of<br>Lonerock. |
| D-26     | "       | "            | NW $\frac{1}{4}$ , T6S, R24E, Sec. 4, SW corner, depres-<br>sion NW of Lonerock cemetery, 1.5 km SE<br>of Lonerock.                      |
| D-27     | "       | "            | NW $\frac{1}{4}$ , T6S, R24E, Sec. 4, NE corner, NE of<br>Lonerock Cemetery.                                                             |
| D-28     | Wheeler | Kimberly     | NW $\frac{1}{4}$ , T7S, R25E, Sec. 26, SE corner,<br>roadcut E. side of highway 207.                                                     |
| D-29     | Grant   | Courtrock    | NW $\frac{1}{4}$ , T10S, R27E, Sec. 1, W. of Cotton-<br>wood Creek road.                                                                 |
| D-30     | "       | "            | NW $\frac{1}{4}$ , T10S, R27E, Sec. 13, NW of road<br>intersection in quarry.                                                            |
| D-31     | "       | "            | NW $\frac{1}{4}$ , T10S, R27E, Sec. 13, just E. of D-30.                                                                                 |
| D-32     | "       | "            | SW $\frac{1}{4}$ , T12S, R27E, Sec. 21, N. side, E. of<br>Franks Creek road.                                                             |
| D-33     | "       | "            | SW $\frac{1}{4}$ , T12S, R27E, Sec. 21, NW corner, W.<br>of Franks Creek road, just W. of D-32.                                          |
| D-34     | "       | Aldrich Mtn. | NE $\frac{1}{4}$ , T13 S, R28E, Sec. 24, W. side, just<br>W. of Fields Creek road.                                                       |
| D-35     | "       | "            | SE $\frac{1}{4}$ , T14S, R28E, Sec. 1, SW corner, E.<br>side of Fields Creek road.                                                       |
| D-36     | "       | "            | SE $\frac{1}{4}$ , T14S, R29E, Sec. 29, W. side, E.<br>side of Fields Creek road in roadcut.                                             |

- continued -

Cont'd.

| Sample # | County | Quadrangle   | Location                                                                                    |
|----------|--------|--------------|---------------------------------------------------------------------------------------------|
| D-37     | Grant  | Aldrich Mtn. | SE $\frac{1}{4}$ , T14S, R29E, Sec. 32, NW corner, W. side of Fields Creek road in roadcut. |
| D-38     | "      | "            | SE $\frac{1}{4}$ , T15S, R29E, Sec. 5, near center, E. side of road.*                       |
| D-39     | "      | "            | SE $\frac{1}{4}$ , T15S, R29E, Sec. 5, just S. of D-38 beside road.*                        |

\* As the Fields Creek road nears the divide between Fields Creek and Beaver and Tex Creeks, the location of the present road (197~~4~~) diverges from that shown on the 1940 Aldrich Mtn. ~~data~~ 15 minute Quadrangle Topographic Sheet. This divergence <sup>makes</sup> ~~made~~ the accurate location of D-38 and D-39 somewhat more difficult.

## Sample Locations - Irregular intrusive bodies of the Monument Swarm, Oregon

| Sample #        | County | Quadrangle | Location                                                                                                                                                                                   |
|-----------------|--------|------------|--------------------------------------------------------------------------------------------------------------------------------------------------------------------------------------------|
| I-1, 2,<br>3, 4 | Grant  | Monument   | SW $\frac{1}{4}$ , T8S, R28E, Sec. 31, E. side. These 4 samples collected on a traverse along boundary between sections 31 and 32.                                                         |
| I-5, 6,<br>7    | "      | "          | SW $\frac{1}{4}$ , T8S, R28E, Sec. 31, N. side. These 3 samples collected from v-shaped exposure of a sill which straddles the boundary between sections 30 and 32.                        |
| I-8, 9,<br>10   | "      | "          | SW $\frac{1}{4}$ , T9S, R27E, Sec. 2, E. side. These 3 samples collected from E. side of a large sill which lies W. of the town of Monument. All 3 samples collected N. of John Day River. |
| I-11            | "      | Courtrock  | NW $\frac{1}{4}$ , T10S, R27E, Sec. 12, NW corner, W. of Cottonwood Creek road.                                                                                                            |
